# Supplementary material for: Quantifying the trade-off between spring phenology and lethal frost risk: a global meta-analysis
Source: Research Square preprint supplement (doi:10.21203/rs.3.rs-6668207/v1), 2025-06-11
Supplement: Supplementary file 1 [file 99a1ebda20a528d9e0e72d74.docx]

**Supporting information for:**

**Quantifying the trade-off between spring phenology and lethal frost risk: a global meta-analysis**

**Table 1. The impact of two distinct strategies evolving under the Trade-off hypothesis on the regulation of spring phenology.**

| Strategies | Advantages | Key references |
| --- | --- | --- |
| Advancing spring phenology as early as possible to maximize the length of photosynthetic season | 1. Earlier spring phenology is advantageous for occupying ecological niches and bare ground1  2. Higher photosynthetic efficiency and ecosystem productivity2,3  3. Less damage by heibivory or infected, more light availability4,5  4. Favor survival and growth potential of the offsprings6 | Yan *et al*., 2024  Lee and Ibáñez, 2021,  Buermann *et al*., 2018  Lee and Ibáñez, 2021, Vitasse, 2013  Zi *et al*., 2022 |
| Delaying spring phenology as much as possible to minimize the lethal frost risk | 1. Preventing irreversible frost damage to newly emerged tissues (e.g. new leaves)7  2. Allocating more resources to vegetation growth and reproduction rather than freezing resistance development8,9 | Chamberlain and Wolkovich, 2021  Körner, 2016, Grossman, 2022 |

**Table 2. The impact of phylogenetic signals on FR and SFM.** Values of Blomberg's K and *p* represent the explaining power, and there is evidence that the evolutionary history of species in regulating the FR or SFM when *p* < 0.05.

| Response variables | Blomberg's K | *p* |
| --- | --- | --- |
| Freezing resistance (FR) | 0.059 | 0.144 |
| Safety margin (SFM) | 0.048 | 0.409 |

**Table 3. Predictor variables and their range for explaining FR and SFM.**

| **Predictor variables** | **Categories/Range (Unit)** |
| --- | --- |
| Life form | Tree, Herbaceous and Shrub |
| Life cycle | Perennial and Annual |
| Freezing test methods | Relative Electrolytic Leakage (REL), e.g. Pertille *et al*., 202410;  Differential Thermal Analysis (DTA), e.g. North *et al*., 202111;  Visual Observation (VOB) include '50% mortality (MTL)', e.g. Hillmann *et al*., 202112; 'Chlorophyll Fluorescence Inactivation (CFI)', e. g. Venn and Green, 201813; 'Triphenyl Tetrazolium Chloride (TTC)', e. g. Andersen *et al*., 201714 |
| Absolute latitude | 20.88 ~ 65.45 (°) |
| Absolute longitude | 1 ~ 170.23 (°) |
| Altitude | 0 ~3535 (m) |
| Freezing resistance | -1.21 ~ -28.30 (℃) |
| Minimum temperature in spring phenology | -7.39 ~ 17.20 (℃) |
| Safety margin | 3.91 ~ 28.69 (℃) |
| Ecosystem type | grassland (include temperate grassland, alpine grassland, tropical grassland), forest (include temperate forest, boreal forest) and shrubland |
| Mean air temperature | -8.19 ~ 23.84 (℃) |
| Mean air temperature variance | 0.36 ~ 1.07 (℃) |
| Maximum air temperature | 14.90 ~ 38.90 (℃) |
| Minimum air temperauture | -31.50 ~ 14.90 (℃) |
| Minimum air temperature variance | 2.51 ~ 14.21 (℃) |
| Precipitation | 52.40 ~ 3381 (mm) |
| Diurnal temperature range | 5.46 ~ 19.12 (℃) |
| Frost day frequency | 0 ~ 269.21 (days) |
| Evapotranspiration | 336.00 ~ 1809.00 (mm) |
| Drought severity index | -4.10 ~ 4.33 |
| Solar radiation | 7832 ~ 19280 (KJ m-1 month-1) |
| Sunshine duration | 290.71 ~ 950.75 (hours) |

**Table 4. Summary of the definitions used in this study.**

| Term | Definition and sources |
| --- | --- |
| Lethal frost risk (LFR) | The probability of irreversible cryoinjury in plant tissues, quantitative evaluation using SFM as a metric16,17 |
| Freezing resistance (FR) | The critical temperature threshold of plants survival for preventing irreversible cryoinjury17 |
| Safety margin (SFM) | The temperature difference between minimum air temperature and freezing resistance during spring phenology15 |
| Minimum temperature during spring phenology (Phe-Tmin) | The minimum air temperature exposure for new emerging tissues during spring phenology (CRU TS v. 4.06) |
| Mean annual temperature (Tmean) | The annual mean air temperature (CRU TS v. 4.06) |
| Mean temperature variance (Tvar) | Standard error of the annual mean air temperature (CRU TS v. 4.06) |
| Maximum temperature (Tmax) | The annual maximum air temperature (CRU TS v. 4.06) |
| Minimum temperature (Tmin) | The annual minimum air temperature (CRU TS v. 4.06) |
| Minimum temperature variance  (Tmin-var) | Standard error of the annual minimum air temperature (CRU TS v. 4.06) |
| Precipitation (Pre) | The total annual precipitation (CRU TS v. 4.06) |
| Diurnal temperature range (DTR) | The difference between the maximum and minimum temperatures recorded within a 24-hour period at a specific location (CRU TS v. 4.06) |
| Frost day frequency (FRS) | The number of days within a specified period on which the minimum temperature falls at or below 0℃ (32℉) (CRU TS v. 4.06) |
| Evapotranspiration (Eva) | The combined evaporation from plants and soil (CRU TS v. 4.06) |
| Drought severity index (DSI) | A production of the self-calibrating Palmer Drought Severity Index18,19 |
| Solar radiation (Solar) | The electromagnetic energy reaches the Earth which emitted by the sun (CRU TS v. 4.06) |
| Sunshine duration (Ssh) | The total amount of time (hours) during a year in which direct solar radiation exceeds a specified threshold (CRU TS v. 4.06) |

**Table 5. Relative importance (IncMSE) and the ranking of each key predictor (in the parentheses) for weighted FR drived from the random forest model across different categorizes.** Predictor significance levels: strong (*p* < 0.01, bold), moderate ( *p* <0.05, italic), and weak (*p* < 0.1, regular), ns indicated non-significant predictores at 0.1 level in the model**.**

| **Variable** | **All** | **Ecosystem type** | | | **Life form** | | | **Life cycle** | | **Species** | | |
| --- | --- | --- | --- | --- | --- | --- | --- | --- | --- | --- | --- | --- |
| Forest | Grassland | Shrubland | Tree | Herbs | Shrub | Perennial | Annual | Early | Mid | Late |
| Lat | *13.0(15)* | *8.8(4)* | **12.1(11)** | ns | *10.3(14)* | **16.2(1)** | *7.5(6)* | *11.3(15)* | **6.0(1)** | **11.0(5)** | ns | 9.1(10) |
| Lon | **14.9(9)** | *10.1(2)* | *11.6(13)* | ns | **14.3(4)** | *8.7(5)* | *7.5(7)* | **14.7(9)** | ns | *6.9(11)* | **11.6(2)** | *7.4(14)* |
| Alt | **16.1(7)** | 5.1(12) | **16.6(2)** | ns | **13.9(6)** | *11.9(3)* | *7.4(8)* | **18.6(3)** | 3.2(4) | ns | *10.8(4)* | 9.1(11) |
| Phe-Tmin | ns | ns | ns | ns | ns | 12.5(2) | *10.2(2)* | *16.6(5)* | ns | ns | ns | 10.0(7) |
| Tmean | **17.6(3)** | **9.5(3)** | *11.5(14)* | ns | **12.1(9)** | *9.4(4)* | *7.8(4)* | **13.4(12)** | ns | **8.4(8)** | **11.1(3)** | *10.2(6)* |
| Tvar | 10.7(16) | ns | *9.6(16)* | ns | *11.5(11)* | 6.3(11) | *5.2(12)* | 10.8(16) | 3.2(5) | *7.7(9)* | ns | ns |
| Tmax | **24.3(1)** | **8.2(5)** | **18.5(1)** | *3.4(1)* | **18.9(1)** | *7.5(8)* | *6.4(9)* | **23.1(1)** | ns | 6.5(13) | **16.1(1)** | **12.0(2)** |
| Tmin | **13.1(14)** | ns | *12.0(12)* | ns | *10.4(13)* | ns | **10.6(1)** | *12.7(13)* | ns | ns | ns | *8.1(12)* |
| Tmin-var | *13.4(12)* | ns | *12.4(10)* | ns | ***9.9(15)*** | 6.3(12) | 4.4(14) | *14.1(10)* | *4.2(2)* | *6.9(12)* | ns | *7.3(15)* |
| Pre | **16.9(4)** | 6.2(9) | **14.3(4)** | ns | **15.1(3)** | *8.2(6)* | **8.3(3)** | **17.4(4)** | ns | *8.5(7)* | *8.4(10)* | *9.2(9)* |
| DTR | **21.6(2)** | 6.5(8) | **15.8(3)** | ns | **15.3(2)** | *7.1(9)* | 4.6(13) | **20.7(2)** | ns | **12.6(2)** | *8.9(8)* | **16.6(1)** |
| FRS | **16.4(5)** | 5.4(11) | **14.3(5)** | ns | *11.6(10)* | *8.2(7)* | **7.5(5)** | **14.9(8)** | ns | *7.0(10)* | **10.1(6)** | **10.4(4)** |
| Eva | **13.8(10)** | *7.1(7)* | **11.2(15)** | ns | *12.6(8)* | ns | ns | **15.7(6)** | ns | **12.1(3)** | 8.5(9) | *7.4(13)* |
| DSI | **13.7(11)** | 5.7(10) | **12.6(9)** | ns | *9.1(16)* | 6.9(10) | 4.3(15) | *12.6(14)* | 4.0(3) | *8.6(6)* | ns | **10.2(5)** |
| Solar | **16.2(6)** | **12.2(1)** | **13.4(7)** | ns | **14.3(5)** | *6.0(13)* | 6.0(10) | **15.1(7)** | ns | **13.7(1)** | *9.1(7)* | *10.0(8)* |
| Ssh | *13.2(13)* | **7.9(6)** | **13.3(8)** | ns | *13.4(7)* | ns | 5.5(11) | **13.5(11)** | ns | **12.0(4)** | ns | **10.6(3)** |

**Table 6. Relative importance (IncMSE) and the ranking of each key predictor (in the parentheses) for weighted SFM drived from the random forest model across different categorizes.** Predictor significance levels: strong (*p* < 0.01, bold), moderate ( *p* <0.05, italic), and weak (*p* < 0.1, regular), ns indicated non-significant predictores at 0.1 level in the model**.**

| **Variable** | **All** | **Ecosystem type** | | | **Life form** | | | **Life cycle** | | **Species** | | |
| --- | --- | --- | --- | --- | --- | --- | --- | --- | --- | --- | --- | --- |
| Forest | Grassland | Shrubland | Tree | Herbs | Shrub | Perennial | Annual | Early | Mid | Late |
| Lat | **11.0(12)** | ns | *11.1(8)* | ns | ***8.4(11)*** | **14.1(3)** | 4.4(12) | *11.6(8)* | ns | *6.7(13)* | *8.8(9)* | *5.9(14)* |
| Lon | **11.4(10)** | *6.0(8)* | **12.5(4)** | ns | *10.8(5)* | **9.4(5)** | *5.5(7)* | **10.5(11)** | ns | *11.1(3)* | *7.3(12)* | *5.6(15)* |
| Alt | **11.3(11)** | ns | **10.2(11)** | ns | *7.3(17)* | **8.5(7)** | *7.5(4)* | *10.5(12)* | ns | ns | 6.4(15) | **9.8(5)** |
| FR | **60.6(1)** | **19.6(1)** | **52.6(1)** | **13.0(1)** | **44.7(1)** | **21.8(1)** | **20.9(1)** | **59.1(1)** | ns | **32.6(1)** | **41.4(1)** | **25.1(1)** |
| Phe-Tmin | **27.7(2)** | *10.5(3)* | **27.0(2)** | **7.0(2)** | **18.9(2)** | **16.9(2)** | *9.1(2)* | **24.0(1)** | 6.9(2) | *11.6(2)* | **19.6(2)** | **14.7(2)** |
| Tmean | **12.9(7)** | **9.8(4)** | *10.0(12)* | ns | *8.5(10)* | **10.9(4)** | 4.0(15) | *10.4(13)* | ns | *7.8(9)* | **9.0(6)** | *6.2(11)* |
| Tvar | **10.2(15)** | ns | *8.7(16)* | ns | 7.6(15) | **7.0(9)** | ns | **11.3(9)** | ns | 6.1(14) | **10.2(5)** | *6.3(9)* |
| Tmax | **11.5(9)** | **11.4(2)** | *9.9(13)* | ns | **8.9(9)** | ns | 5.9(6) | **12.0(7)** | 3.3(4) | *7.4(10)* | **10.2(4)** | **8.9(6)** |
| Tmin | **14.4(4)** | **6.3(7)** | **12.0(5)** | ns | **13.4(4)** | *6.2(11)* | 5.3(8) | **15.2(4)** | ns | **10.5(5)** | **8.4(11)** | **6.3(10)** |
| Tmin-var | **14.1(5)** | ns | *11.7(6)* | ns | *9.0(8)* | ns | 4.0(14) | **13.2(6)** | ns | **10.6(4)** | **9.0(7)** | **8.1(7)** |
| Pre | **13.8(6)** | ns | **11.5(7)** | ns | **9.2(7)** | 6.0(12) | 7.1(5) | **14.8(5)** | 3.7(3) | ns | *8.8(8)* | *6.1(12)* |
| DTR | **10.3(14)** | **8.1(6)** | *10.5(10)* | ns | *7.8(12)* | *5.4(13)* | 4.6(11) | *9.8(16)* | **7.0(1)** | 7.3(11) | 6.1(16) | **13.1(3)** |
| FRS | **17.9(3)** | **8.4(5)** | **16.0(3)** | ns | **14.9(3)** | **8.6(6)** | **9.0(3)** | **17.2(3)** | ns | **6.7(6)** | **11.1(3)** | **11.0(4)** |
| Eva | **9.6(16)** | **5.9(9)** | ns | ns | 7.4(16) | 4.8(14) | ns | *9.6(17)* | ns | **9.1(7)** | 7.0(14) | *5.4(16)* |
| DSI | **9.0(17)** | ns | *8.9(15)* | ns | *7.7(13)* | *6.4(10)* | ns | **11.0(10)** | ns | 5.8(15) | ns | ns |
| Solar | **10.8(13)** | ns | **10.5(9)** | ns | *7.6(14)* | **8.0(8)** | ns | *10.3(14)* | ns | 7.3(12) | *7.3(13)* | 6.0(13) |
| Ssh | **12.1(8)** | 4.5(12) | *9.6(14)* | ns | **9.4(6)** | 4.3(15) | 5.1(9) | *10.0(15)* | ns | *8.3(8)* | *8.4(10)* | **7.8(8)** |

**Table 7. Potential mechanisms underlying the impact of explanatory variables on FR.** The ‘Rank’ column indicated the ranking of relative importance (IncMSE) of each variable drived from the random forest model.Predictor significance levels: strong (*p* < 0.01, bold), moderate ( *p* <0.05, italic), and weak (*p* < 0.1, regular), ns indicated non-significant predictors at 0.1 level in the model.

| **Variables** | **Rank** | **Correlation** | **Mechanism** | **Reference** |
| --- | --- | --- | --- | --- |
| Tmax | 1 | moderate positive | 1. Warmer spring facilitates a more thorough process of deacclimation20  2. The freezing resistance largely depends on the history of recent temperatures17 | Vyse *et al*., 2019  Vitasse *et al*., 2014 |
| DTR | 2 | ns | 1. DTR is associated with the accumulation of dry matter (e.g. non-structure carbohydrate), which related to the development of freezing resistance21  2. Plants adopt different strategies (escape, avoidance, and tolerance) to cope with freezing conditions that may contribute to the non-significant regression relationship17 | Tan *et al*., 2023  Vitasse *et al*., 2014a |
| Tmean | 3 | moderate positive | 1. Above-ground tissues in colder regions with higher soluble sugar that contributes to reduce freezing points of cytoplasmic22,23  2. Low non-freezing temperatures are conducive to cold acclimation24 | Blumstein *et al*., 2022  Körner, 2016  Ouyang *et al*., 2022 |
| Phe-Tmin | 8 | ns | 1. The most sensitive phenological stage occurs during bud burst and leaf emergence17  2. New leaves of early flushing species are more freeze resistant than that of late flushing species25 | Vitasse *et al*., 2014  Vitasse *et al*., 2014 |
| Tmin | 14 | moderate positive | 1. Plants in colder regions face a higher risk of severe and irreversible frost damage, necessitating greater freeze resistance to ensure survival26 | Zohner *et al*., 2020 |
| Eva | 10 | moderate positive | 1. High evapotranspiration rates are associated with elevated free water content and metabolic activity, which are detrimental to the development of freezing resistance9,28 | Baffoin *et al*., 2021  Grossman, 2022 |
| Solar | 6 | moderate positive | 1. Under high solar radiation conditions, plants prone to allocate surplus resource towards growth rather than the development of freezing resistance28,29 | Malyshev *et al*., 2014  Sierra-Almeida *et al*., 2010 |

**Table 8. Potential mechanisms underlying the impact of explanatory variables on SFM.** The ‘Rank’ column indicated the ranking of relative importance (IncMSE) of each variable drived from the random forest model.Predictor significance levels: strong (*p* < 0.01, bold), moderate ( *p* <0.05, italic), and weak (*p* < 0.1, regular), ns indicated non-significant predictors at 0.1 level in the model.

| **Variables** | **Rank** | **Correlation** | **Mechanism** | **Reference** |
| --- | --- | --- | --- | --- |
| FR | 1 | strong negative | 1. Plants have developed freezing resistance protecting newly emerge tissues from irreversible frost damage in the context of long-term evolution15 | Lenz *et al*., 2013 |
| Phe-Tmin | 2 | strong positive | 1. Lethal freezing risk increases with the decline of temperatures in late spring25 | Vitasse *et al*., 2014 |
| FRS | 3 | moderate negative | 1. More frequent frost events increase the probability of spring frost damage30  2. The frost-induced reduction in photosynthetic productivity undermines the material foundation for freezing resistance development, thereby resulting in a diminished safety margin31 | Liu *et al*., 2018  Wang *et al*., 2024 |
| Tmin | 7 | strong positive | 1. Minimum temperatures constitute a critical environmental stress factor influencing plant survival32 | Neuner, 2014 |
| Tmin-var | 9 | strong negative | 1. Regions with greater temperature fluctuations face a higher risk of severe frost damage and selection pressure33,34 | Bennie *et al*., 2010  Wang *et al*., 2014 |

**
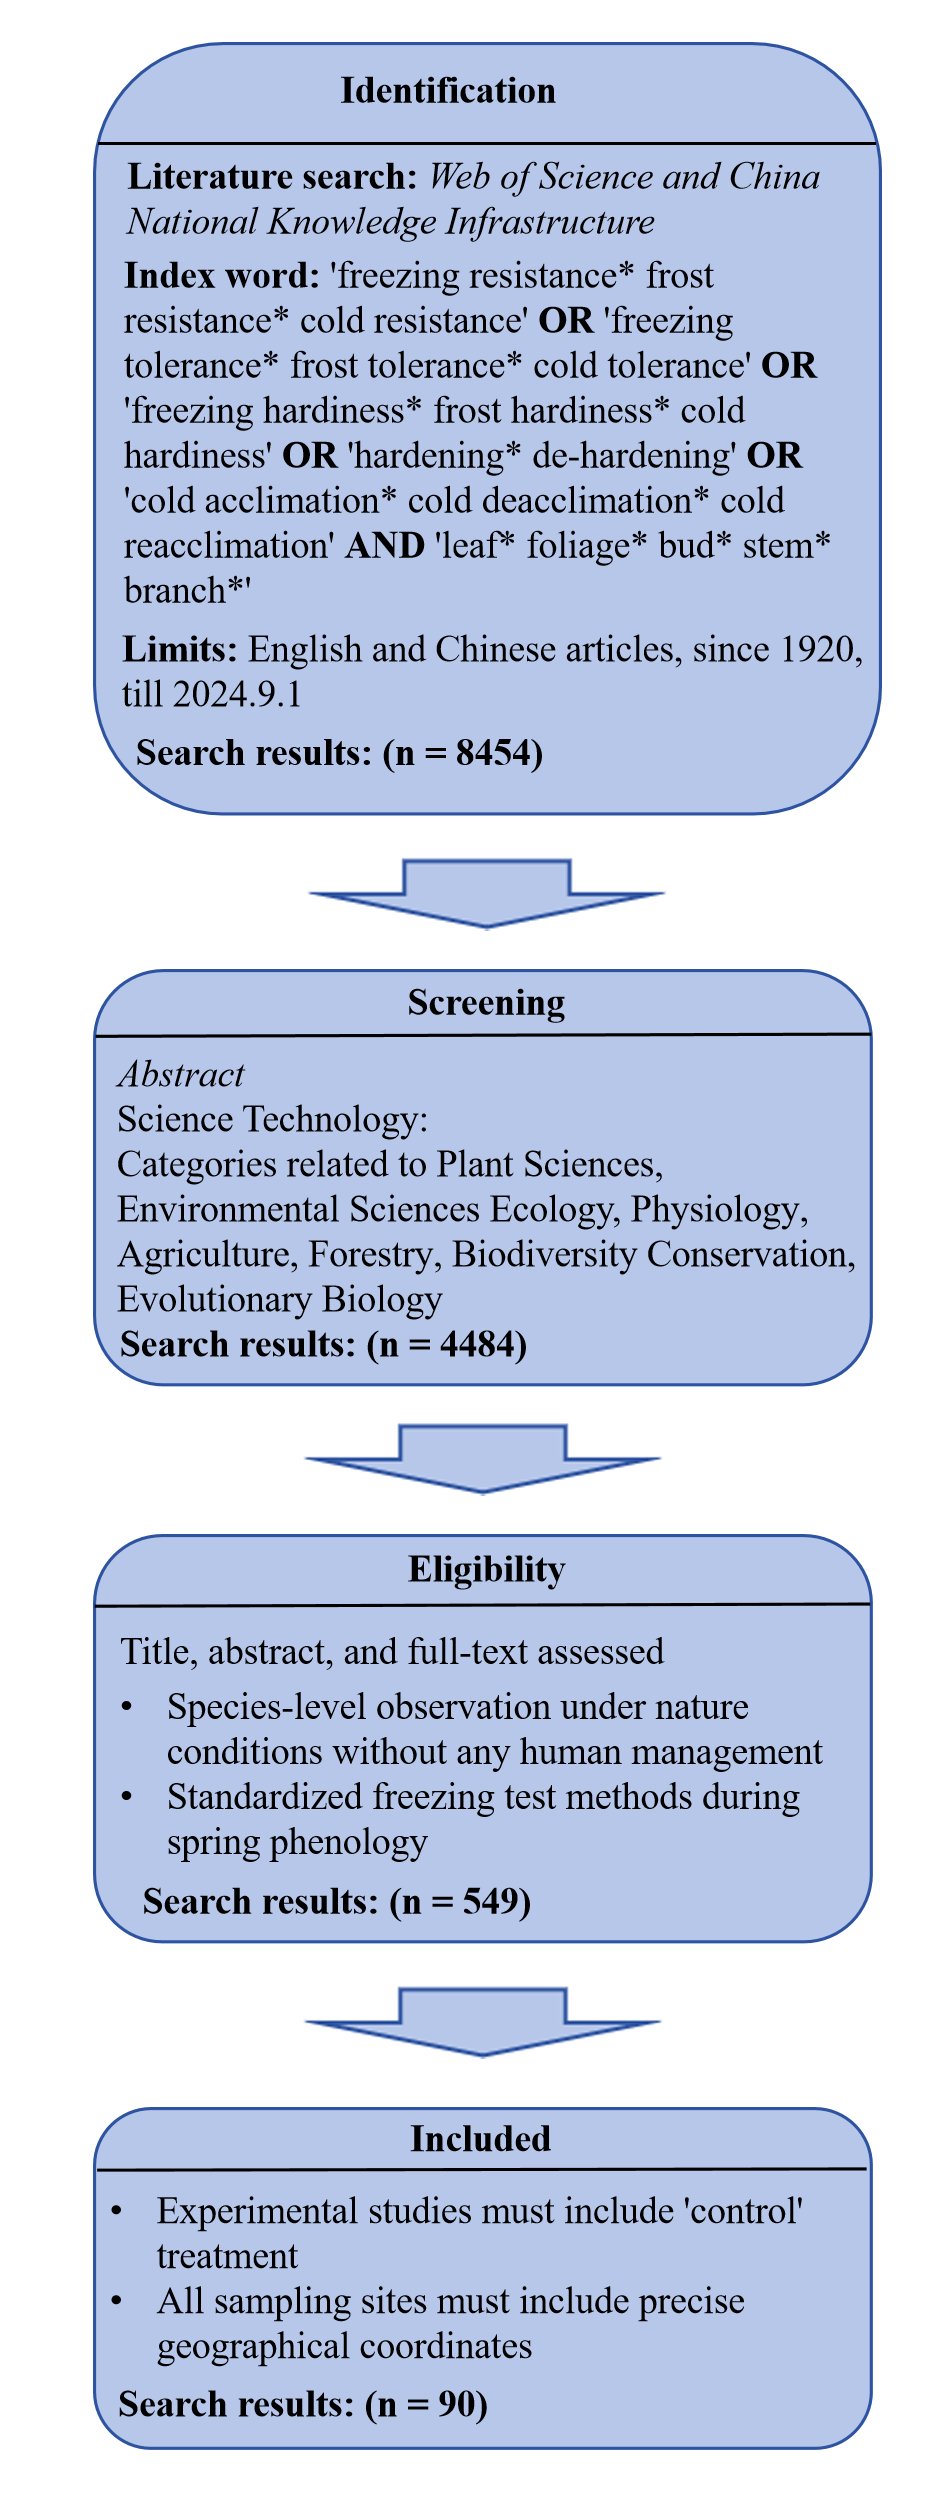
**

**Fig 1. Processes of article filtering for FR and SFM during spring phenology using Preferred Reporting Items for Systematic Reviews (PRISMA) guidelines.**

**
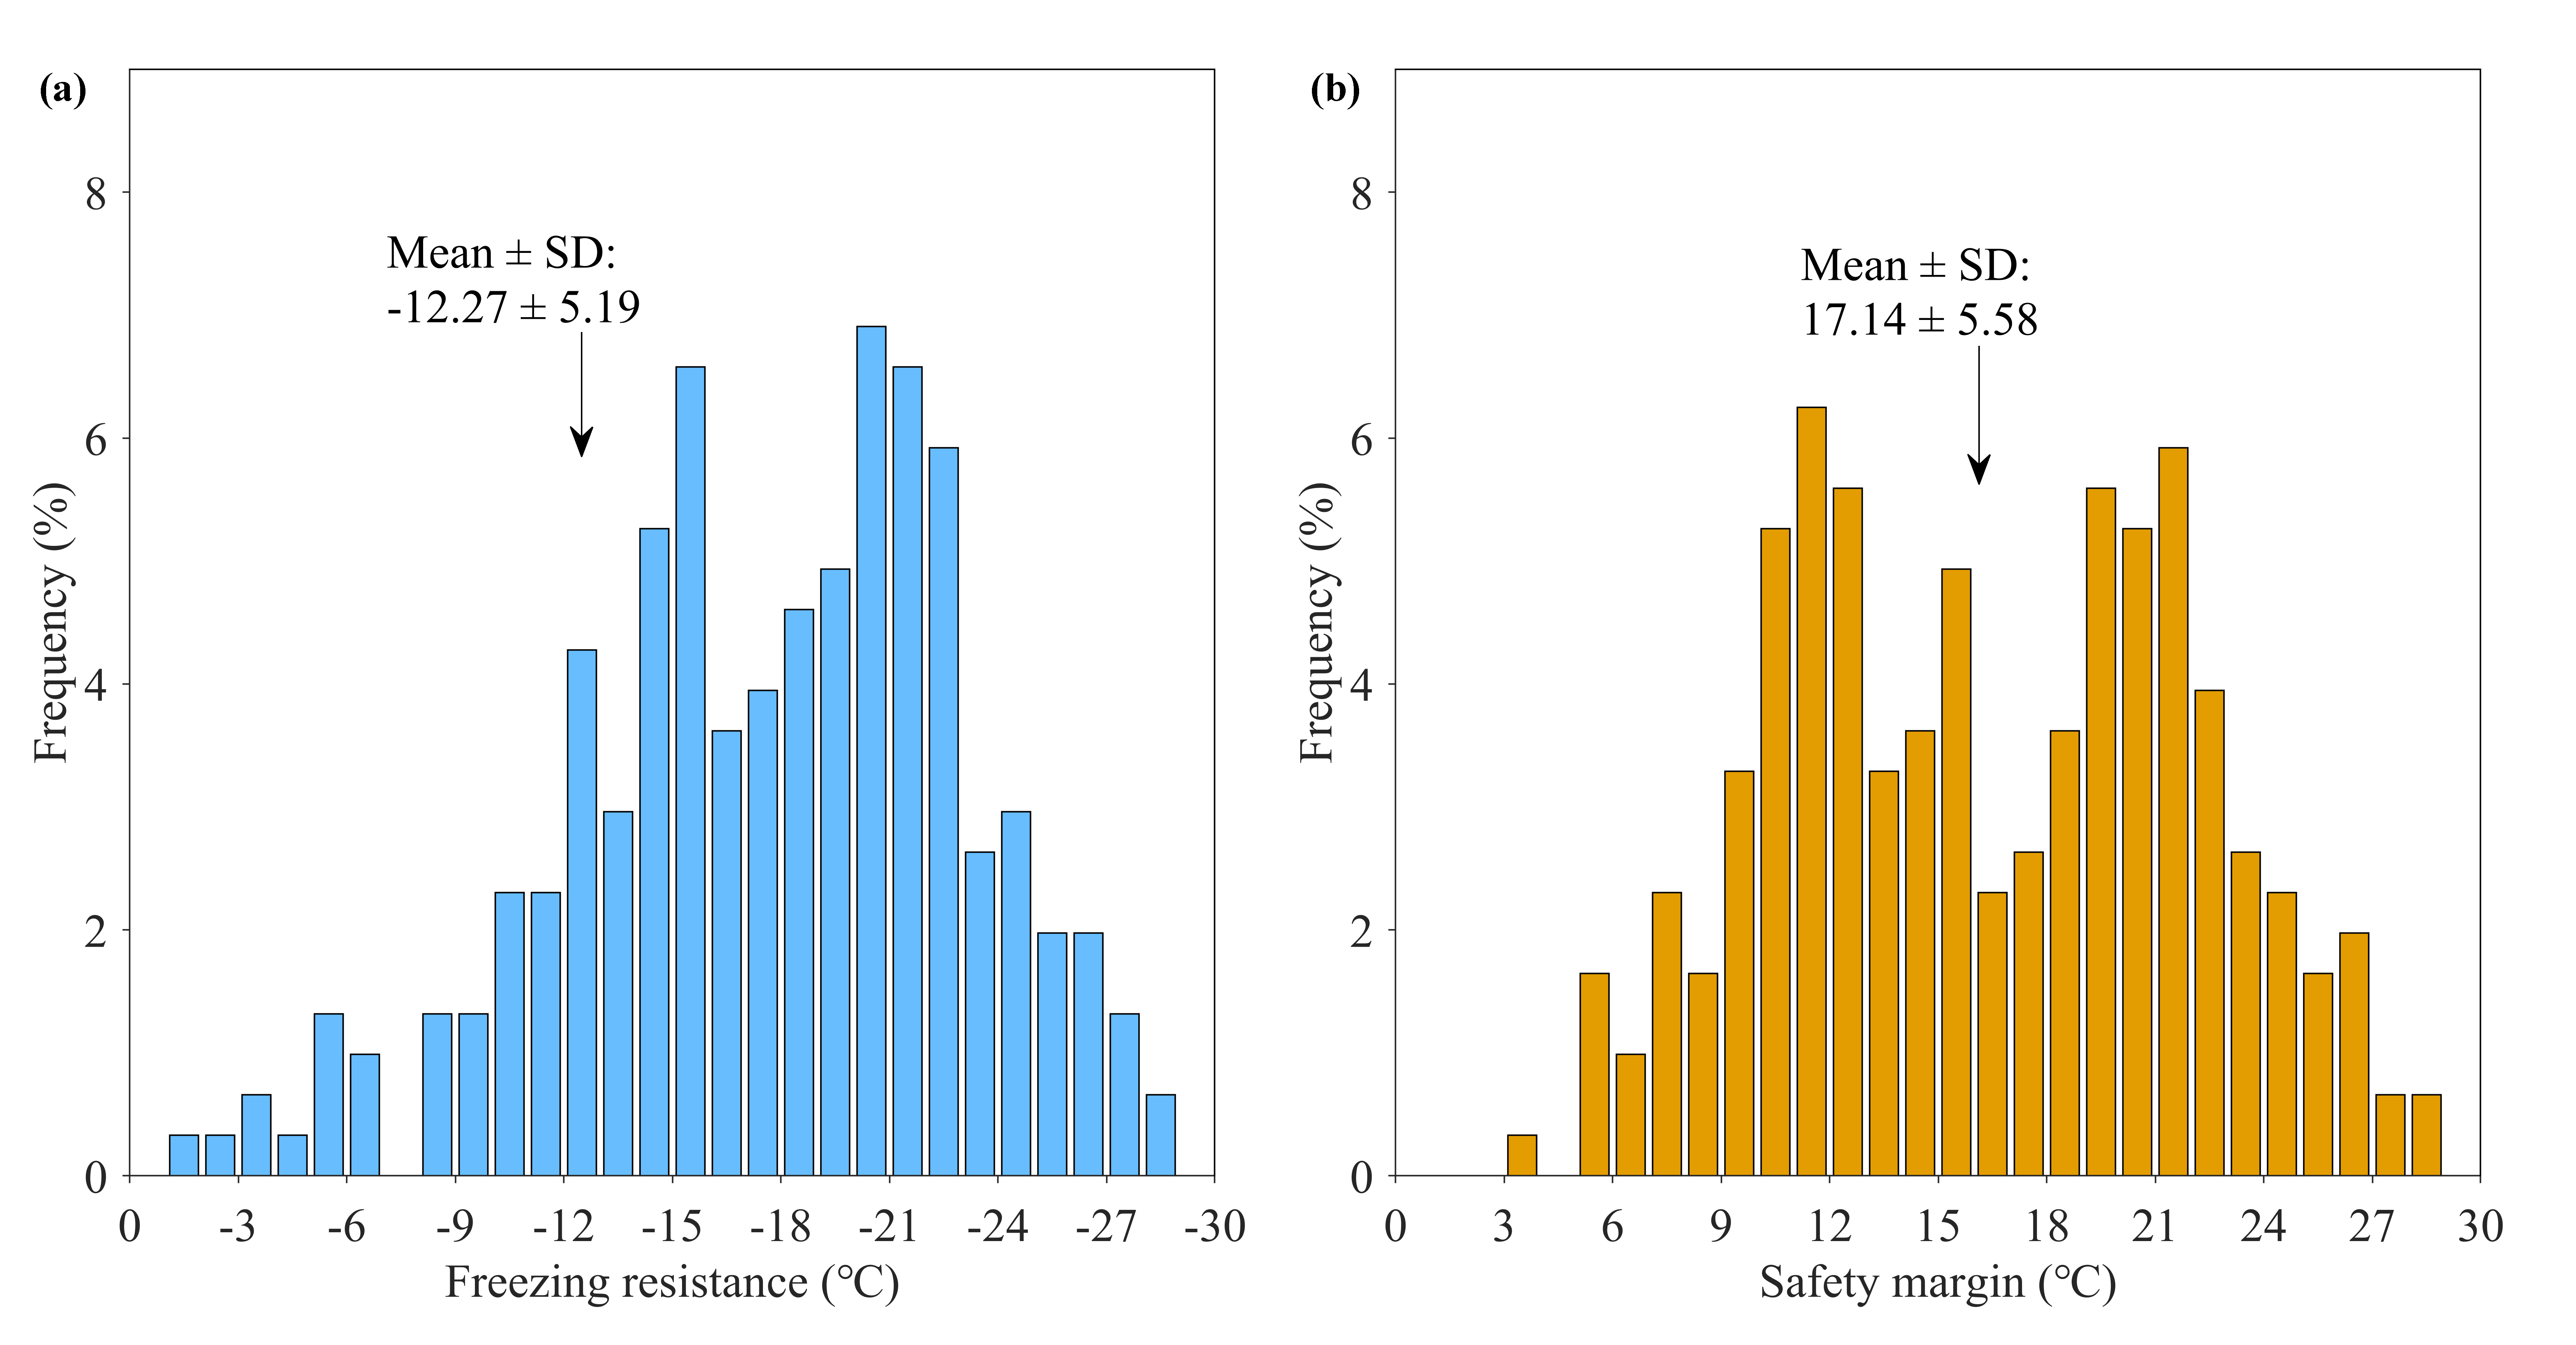
**

**Fig 2. (a) Frequency distributions of freezing resistance and (d) the freezing safety margin after removing the observations from the DTA group.**

**
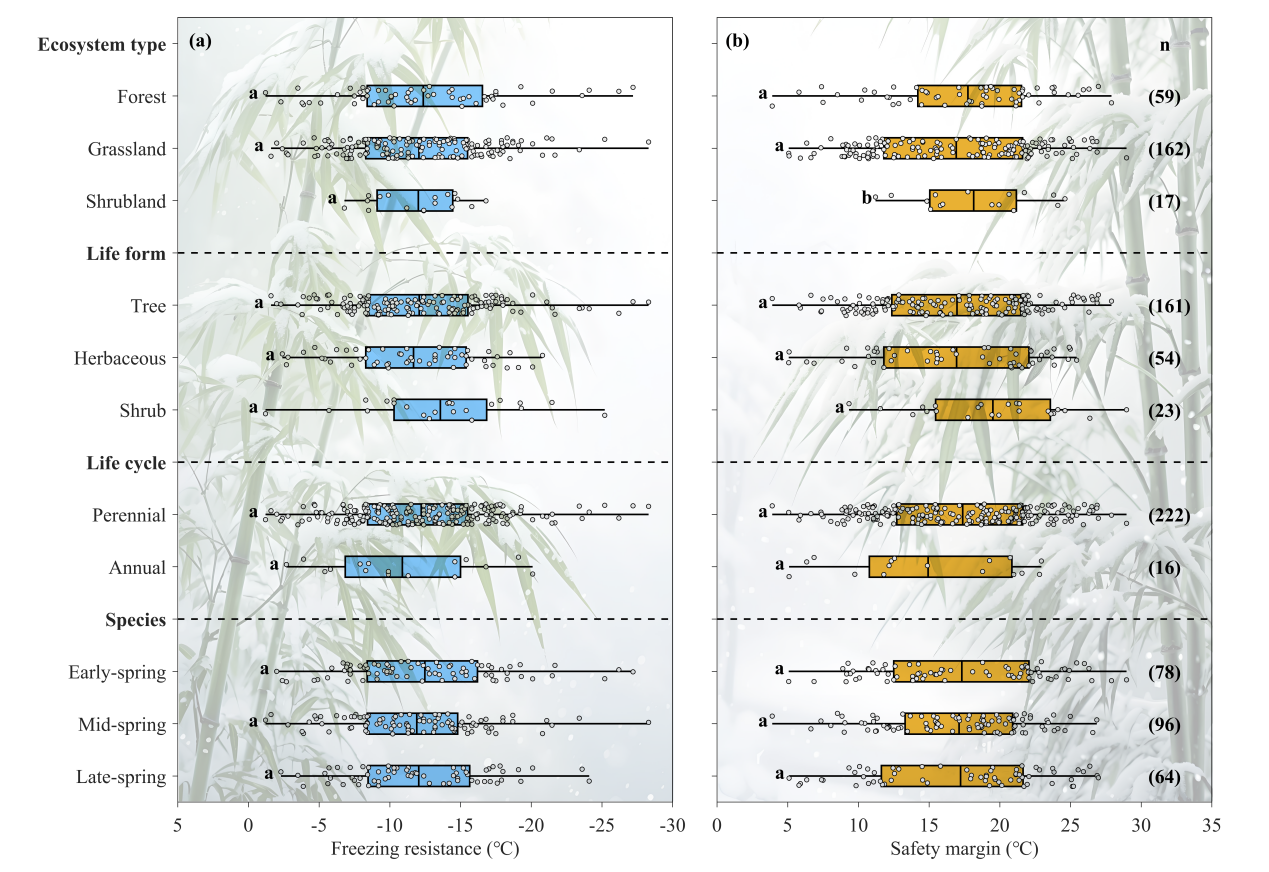
**

**Figure 3. Distribution of (a) freezing resistance and (b) the freezing safety margin for different data subsets after removing the observations from the DTA group.** Boxplots display the mean (vertical solid line), the 25th and 75th percentiles (colored boxes), and the minimum and maximum values (whiskers). Jittered points represent independent samples for each group. Numbers in the parentheses (at right) are the matched sample size for each group. Different lowercase letters indicate significant differences among groups within categories (p < 0.1) as determined using linear mixed models, the linear mixed models are described in detail in the Materials and Methods section.

**
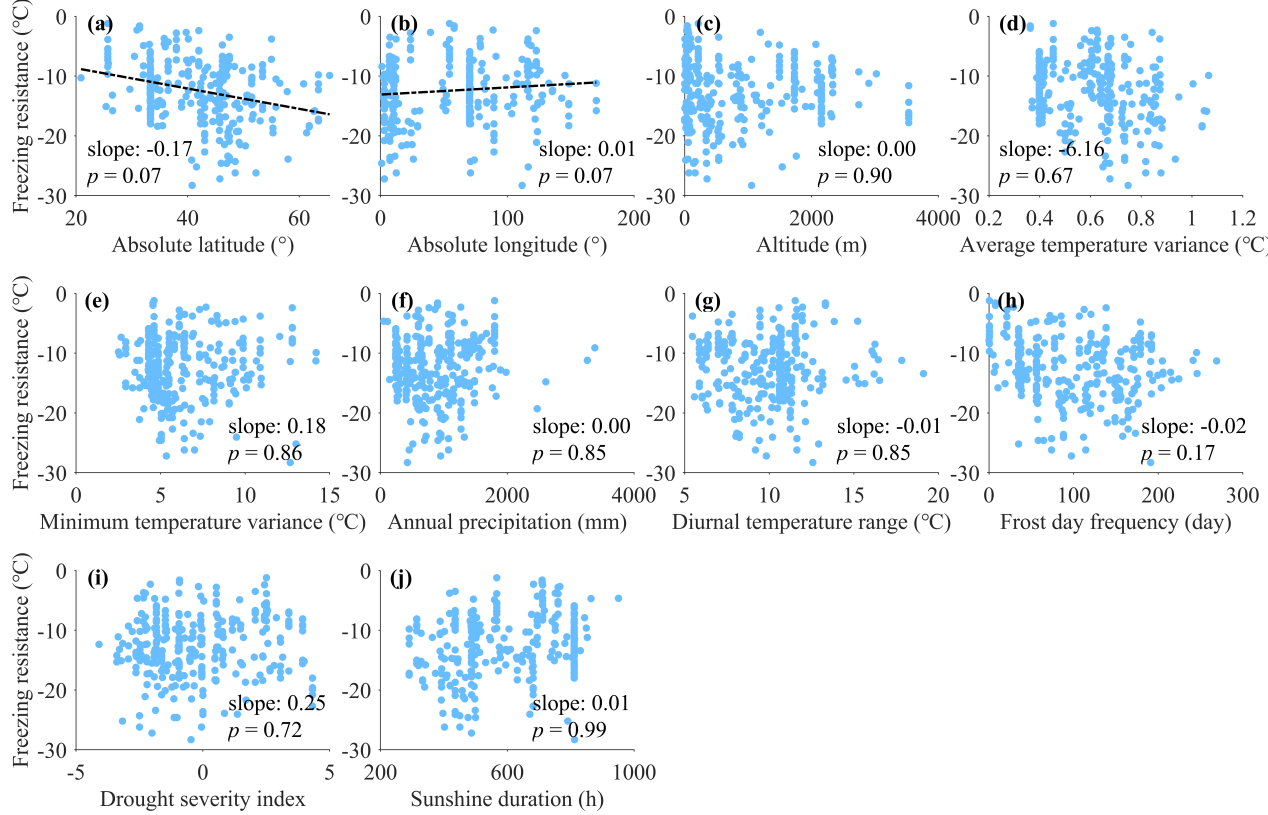
**

**Fig 4. Explanatory variables of freezing resistance (FR) during spring phenology for all species.** (a) - (j) The weak (*p* < 0.1) (dot line) predictors of freezing resistance as assessed using linear mixed models (two-tailed paired *t*-tests) in explaining FR using linear mixed models (two-side paired *t*-test).

**
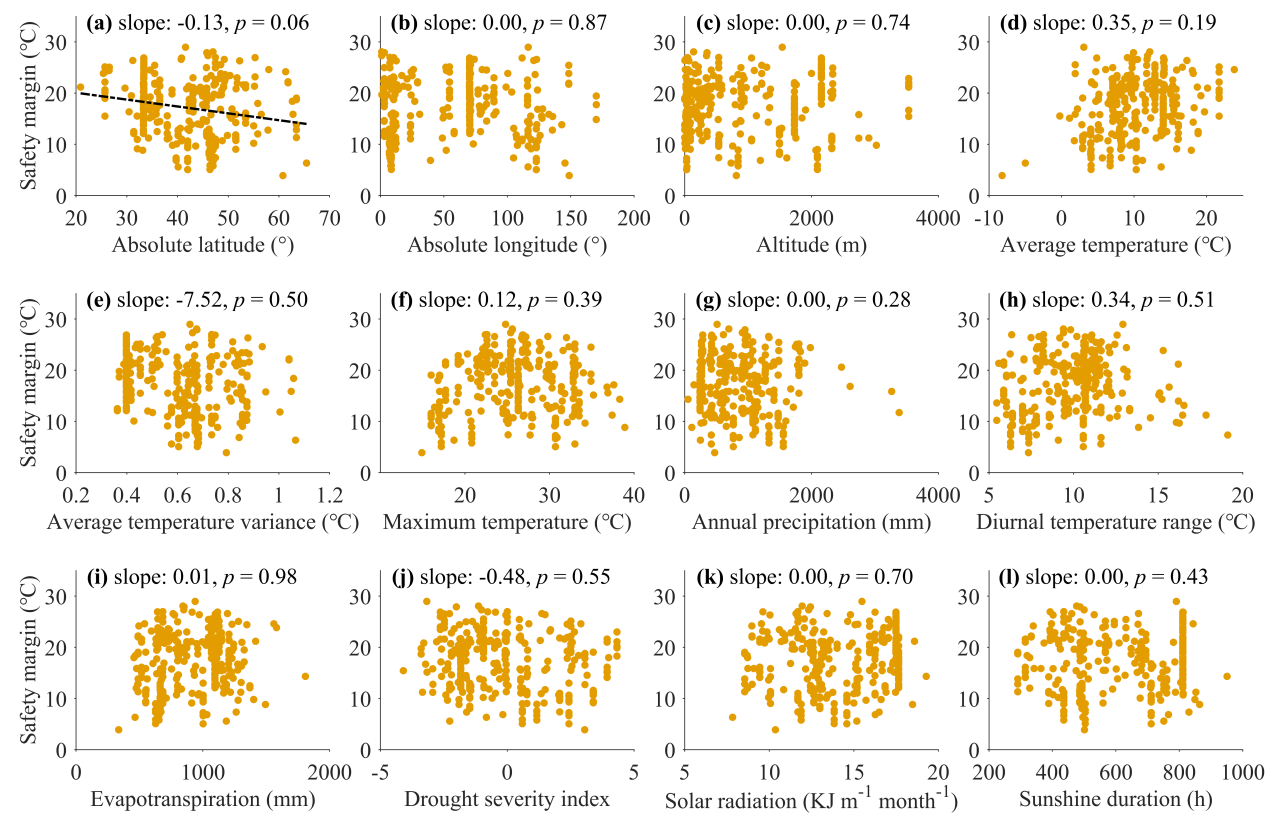
**

**Fig 5. Explanatory variables of safety margin (SFM) during spring phenology for all species.** (a) - (l) The weak (*p* < 0.1) (dot line) predictors of freezing safety margin as assessed using linear mixed models (two-tailed paired *t*-tests) in explaining SFM using linear mixed models (two-side paired *t*-test).

**
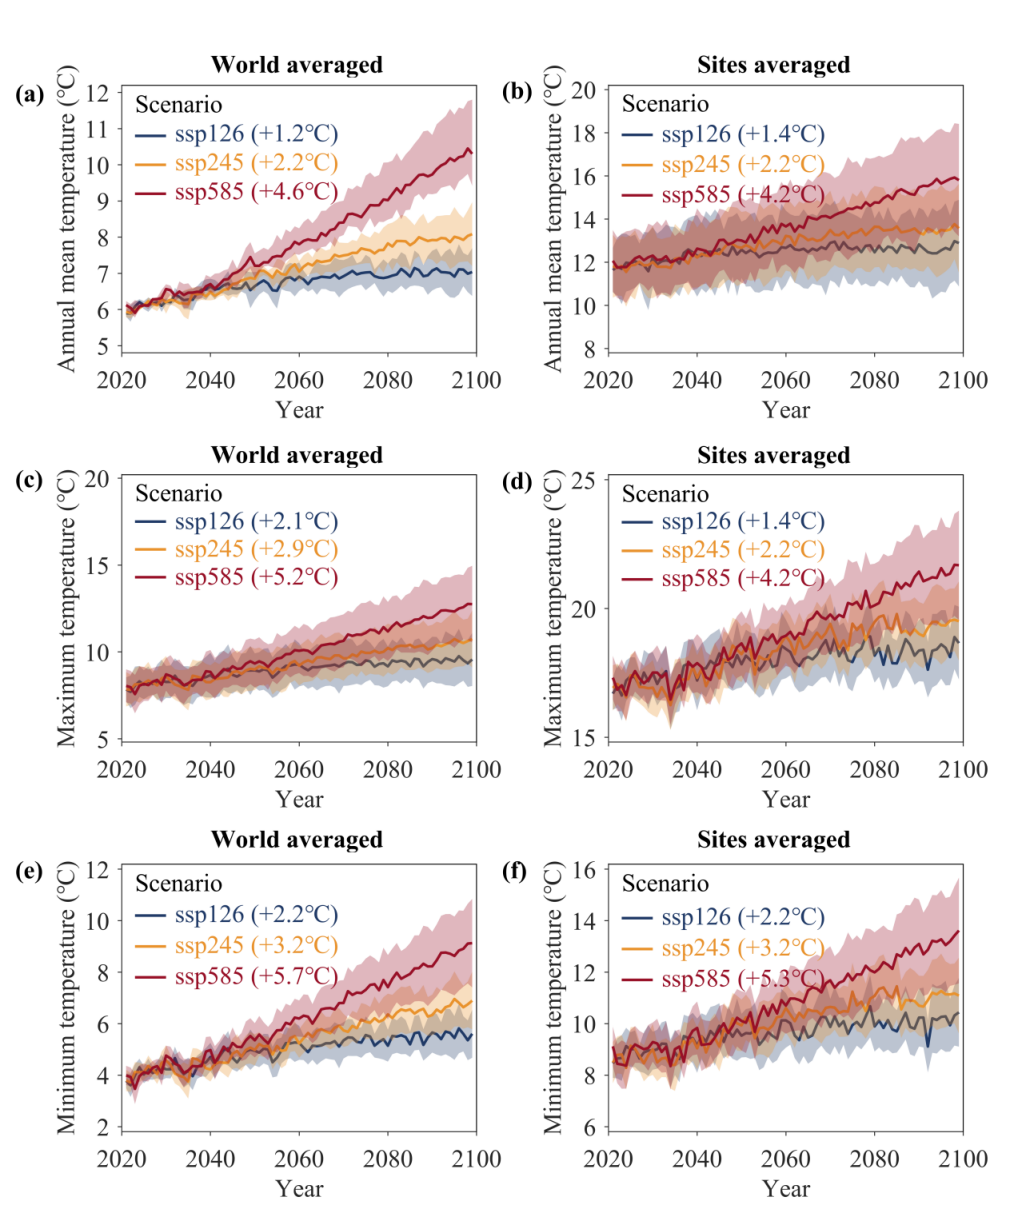
**

**Fig 6. Projections of future (a) - (b) annual mean temperatures, (c) - (d) maximum temperaturees, and (e) - (f) minimum temperatures globally and averaged across all study sites.** Projections for the period from 2021 to 2099 are based on general circulation models (GCMs) from the Coupled Model Intercomparison Project Phase 6 (CMIP6) and examine three Shared Socioeconomic Pathways, SSP1-2.6 (low-warming scenario), SSP2-4.5 (medium-warming scenario), and SSP5-8.5 (high-warming scenario). Temperature anomalies compared to 2021 are shown in parentheses, shading denotes the mean ± standard error from the climate models.

**
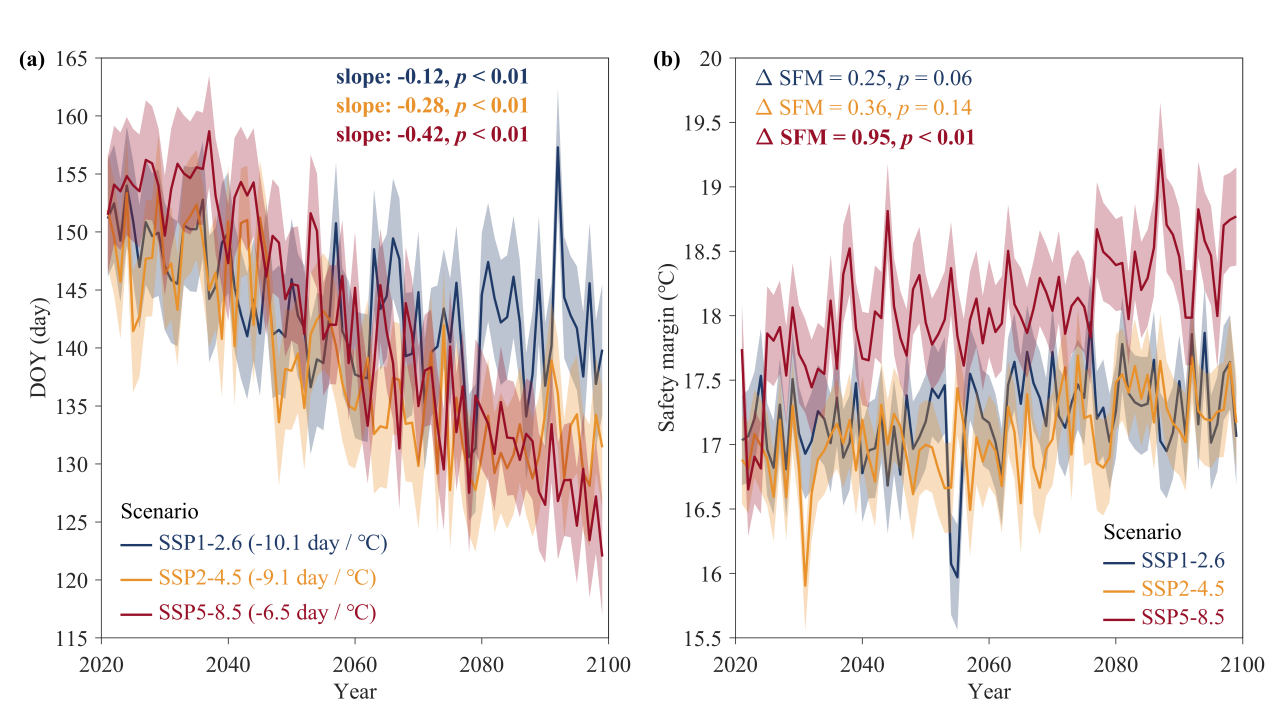
**

**Fig 7.** **Projections of future spring phenology and the freezing safety margin using model T0.** Projections for the period from 2021 to 2099 are based on general circulation models (GCMs) from the Coupled Model Intercomparison Project Phase 6 (CMIP6) and examine three Shared Socioeconomic Pathways, SSP1-2.6 (low-warming scenario), SSP2-4.5 (medium-warming scenario), and SSP5-8.5 (high-warming scenario). (a) Predicted future spring phenology (phenological temperature sensitivity is shown in parentheses) and (b) freezing safety margins are illustrated for the three climate warming scenarios, shading denotes the mean ± standard error across all species. Significant results are indicated in bold, whether weak (*p* < 0.1), moderate (*p* < 0.05), or strong (*p* < 0.01) as determined using Tukey’s HSD tests. Δ SFM represents the difference between the safety margin (SFM) during the last five years (2095–2099) and the first five years (2020–2024) of the projection period.

**
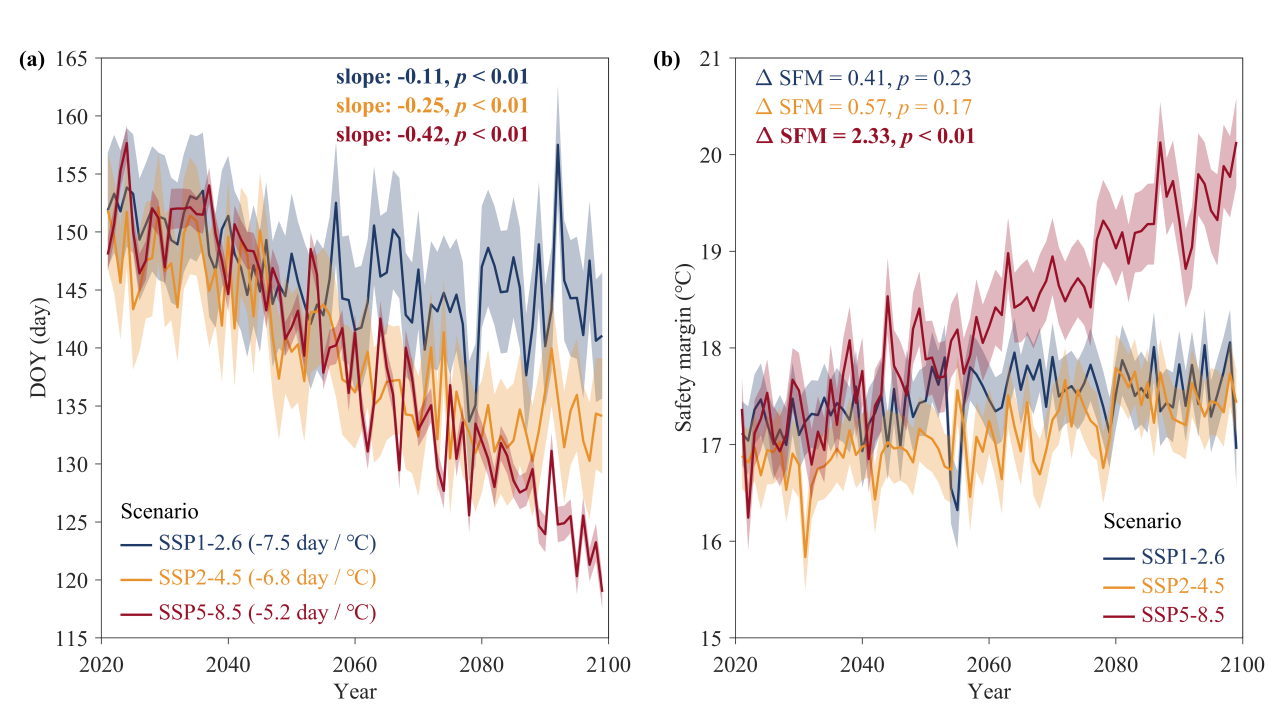
**

**Fig 8. Projections of future spring phenology and the freezing safety margin using model Tlf.** Projections for the period from 2021 to 2099 are based on general circulation models (GCMs) from the Coupled Model Intercomparison Project Phase 6 (CMIP6) and examine three Shared Socioeconomic Pathways, SSP1-2.6 (low-warming scenario), SSP2-4.5 (medium-warming scenario), and SSP5-8.5 (high-warming scenario). (a) Predicted future spring phenology (phenological temperature sensitivity is shown in parentheses) and (b) freezing safety margins are illustrated for the three climate warming scenarios, shading denotes the mean ± standard error across all species. Significant results are indicated in bold, whether are weak (*p* < 0.1), moderate (*p* < 0.05), or strong (*p* < 0.01) as determined using Tukey’s HSD tests. Δ SFM represents the difference between the safety margin (SFM) during the last five years (2095–2099) and the first five years (2020–2024) of the projection period.

**
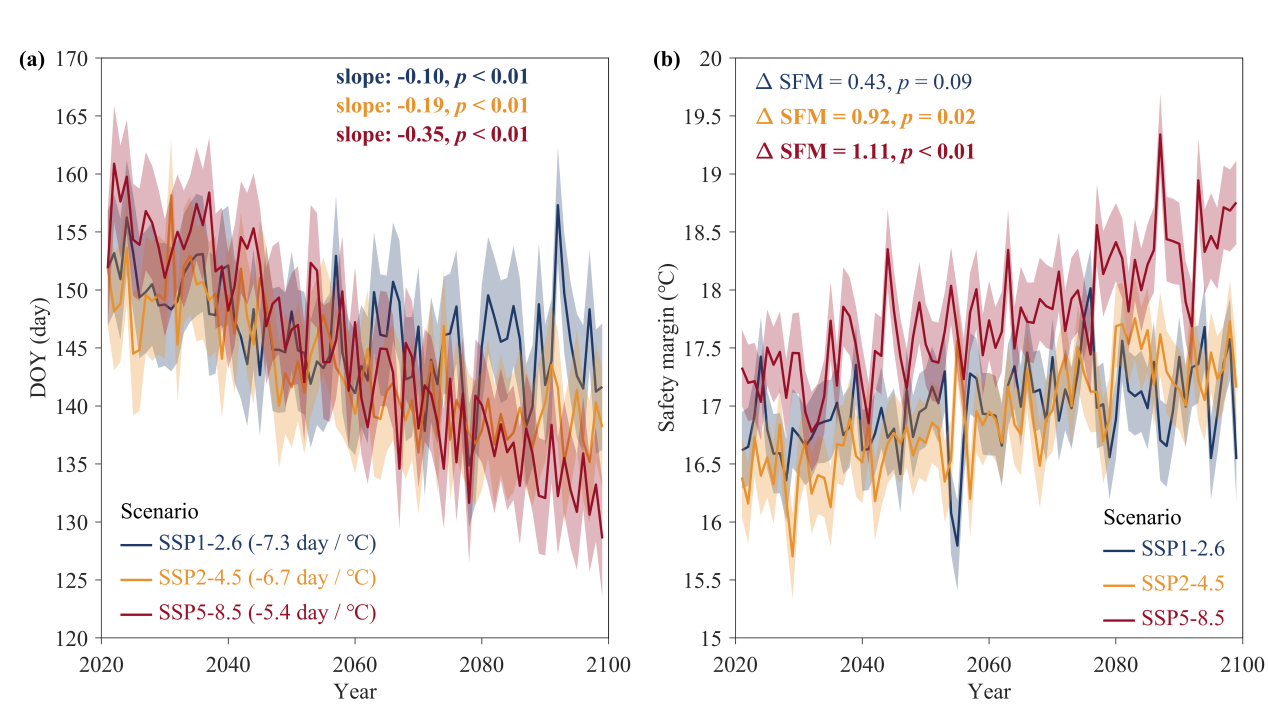
**

**Fig 9. Projections of future spring phenology and the freezing safety margin using model Tmax.** Projections for the period from 2021 to 2099 are based on general circulation models (GCMs) from the Coupled Model Intercomparison Project Phase 6 (CMIP6) and examine three Shared Socioeconomic Pathways, SSP1-2.6 (low-warming scenario), SSP2-4.5 (medium-warming scenario), and SSP5-8.5 (high-warming scenario). (a) Predicted future spring phenology (the phenological temperature sensitivity are shown in parentheses) and (b) freezing safety margins are illustrated for the three climate warming scenarios, shading denotes the mean ± standard error across all species. Significant results are indicated in bold, whether weak (*p* < 0.1), moderate (*p* < 0.05), or strong (*p* < 0.01) as determined using Tukey’s HSD tests. Δ SFM represents the difference between the safety margin (SFM) during the last five years (2095–2099) and the first five years (2020–2024) of the projection period.

**
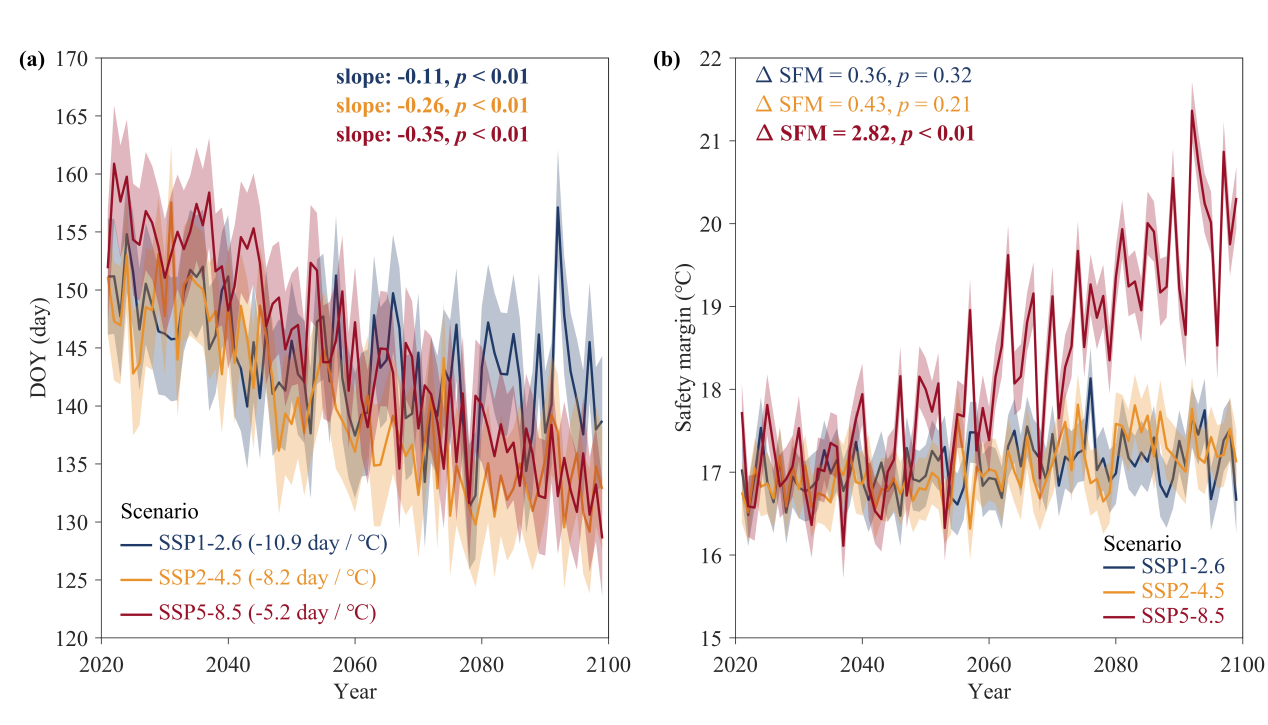
Fig 10. Projections of future spring phenology and the freezing safety margin using model Tmix.** Projections for the period from 2021 to 2099 are based on general circulation models (GCMs) from the Coupled Model Intercomparison Project Phase 6 (CMIP6) and examine three Shared Socioeconomic Pathways, SSP1-2.6 (low-warming scenario), SSP2-4.5 (medium-warming scenario), and SSP5-8.5 (high-warming scenario). (a) Predicted future spring phenology (the phenological temperature sensitivity are shown in parentheses) and (b) freezing safety margins are illustrated for the three climate warming scenarios, shading denotes the mean ± standard error across all species. Significant results are indicated in bold, whether weak (*p* < 0.1), moderate (*p* < 0.05), or strong (*p* < 0.01) as determined using Tukey’s HSD tests. Δ SFM represents the difference between the safety margin (SFM) during the last five years (2095–2099) and the first five years (2020–2024) of the projection period.


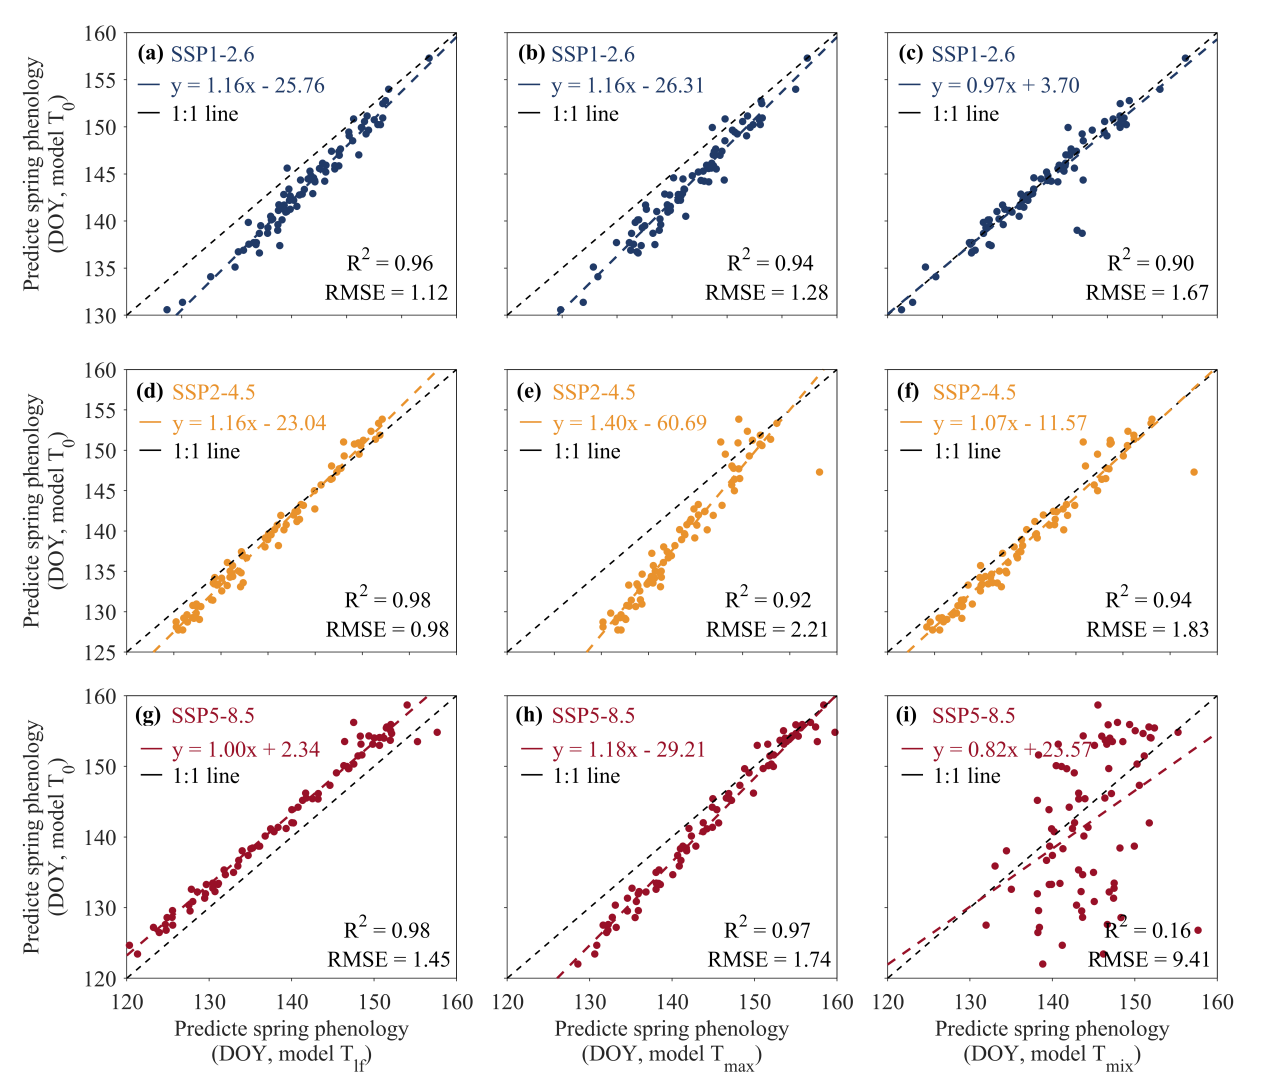


**Fig 11. Comparison of phenological model T0 and three other phenological models for three different climate warming scenarios.** Performance of the degree-accumulated based models was evaluated using both R2 and the root mean square error (RMSE).


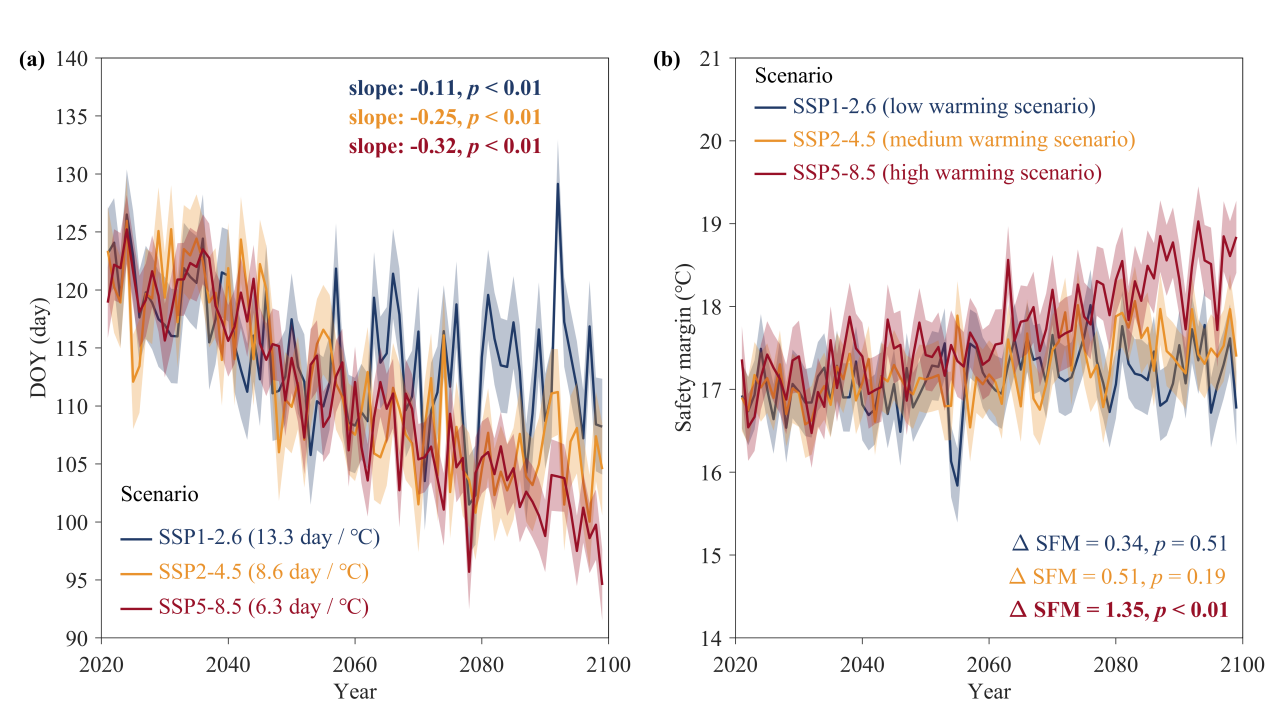


**Fig 12. Projections of future spring phenology and the freezing safety margin averaged across multiple phenological models after excluding observations obtained using differential thermal analysis** **(DTA).** Projections for the period from 2021 to 2099 are based on general circulation models (GCMs) from the Coupled Model Intercomparison Project Phase 6 (CMIP6) and examine three Shared Socioeconomic Pathways, SSP1-2.6 (low-warming scenario), SSP2-4.5 (medium-warming scenario), and SSP5-8.5 (high-warming scenario). (a) Predicted future spring phenology (phenological temperature sensitivity is shown in parentheses) and (b) the freezing safety margin are illustrated for three climate warming scenarios, shading denotes the mean ± standard error from multiple phenological models. Significant results are indicated in bold, whether weak (*p* < 0.1), moderate (*p* < 0.05), or strong (*p* < 0.01) as determined using Tukey’s HSD tests. Δ SFM represents the difference between the safety margin (SFM) during the last five years (2095–2099) and the first five years (2020–2024) in the projection period.

**References**

1. Yan, Z. J. et al. No slowdown of growing season extension with warming in a permafrost- affected meadow on the Tibetan Plateau. *J. Ecol*. **112**, 1774-1789 (2024).

2. Lee, B. R. & Ibáñez, I. Improved phenological escape can help temperate tree seedlings maintain demographic performance under climate change conditions. *Glob Chang Biol*. **27**, 3883-3897 (2021).

3. Buermann, W. et al. Widespread seasonal compensation effects of spring warming on northern plant productivity. *Nature*. **562**, 110-114 (2018).

4. Lee, B. R. & Ibáñez, I. Spring phenological escape is critical for the survival of temperate tree seedlings. *Funct. Ecol*. **35**, 1848-1861 (2021).

5. Vitasse, Y. Ontogenic changes rather than difference in temperature cause understory trees to leaf out earlier. *New Phytol*. **198**, 149-155 (2013).

6. Zi, H. B. et al. Simulated climate warming decreases fruit number but increases seed mass. *Glob Chang Biol*. **29**, 841-855 (2022).

7. Chamberlain, C. J. & Wolkovich, E. M. Late spring freezes coupled with warming winters alter temperate tree phenology and growth. *New Phytol*. **231**, 987-995 (2021).

8. Körner, C. Plant adaptation to cold climates. *F1000Res*. **5** (2016).

9. Grossman, J. J. Phenological physiology: seasonal patterns of plant stress tolerance in a changing climate. *New Phytol*. **237**, 1508-1524 (2022).

10. Pertille, R. H., Citadin, I., de Souza de Oliveira, L. & Suchoronczek, A. Dormancy

dynamics and cold hardiness of apple trees grown in a mild winter region. *Sci. Hortic*. **333**, 113284 (2024).

11.North, M., Workmaster, B. A. & Atucha, A. Cold Hardiness of Cold Climate Interspecific Hybrid Grapevines Grown in a Cold Climate Region. *Am. J. Enol. Vitic*. **72**, 318-327 (2021).

12. Hillmann, L. et al. Preanthesis changes in freeze resistance, relative water content, and ovary growth preempt bud phenology and signify dormancy release of sour cherry floral buds. *Planta*. **254**, 74 (2021).

13. Venn, S. E. & Green, K. Evergreen alpine shrubs have high freezing resistance in spring, irrespective of snowmelt timing and exposure to frost: an investigation from the Snowy Mountains, Australia. *Plant Ecol*. **219**, 209-216 (2018).

14. Andersen, U. B. et al. Impact of seasonal warming on overwintering and spring phenology of blackcurrant. *Environ. Exp. Bot*. **140**, 96-109 (2017).

15. Lenz, A., Hoch, G., Vitasse, Y. & Körner, C. European deciduous trees exhibit similar safety margins against damage by spring freeze events along elevational gradients. *New Phytol*. **200**, 1166-1175 (2013).

16. Lenz, A., Hoch, G. & Vitasse, Y. Fast acclimation of freezing resistance suggests no influence of winter minimum temperature on the range limit of European beech. *Tree Physiol*. **36**, 490-501 (2016).

17. Vitasse, Y., Lenz, A. & Körner, C. The interaction between freezing tolerance and phenology in temperate deciduous trees. *Front Plant Sci*. **5**, 541 (2014).

18. Barichivich, J., Osborn, T. J., Harris, I., van der Schrier, G. & Jones, P. D.

Monitoring global drought using the self-calibrating Palmer Drought Severity Index [in 'State of the Climate in 2021']. *Bull. Am. Meteorol. Soc*. **103**, S31-S33 (2022).

19. van der Schrier, G., Barichivich, J., Briffa, K. R. & Jones, P. D. A scPDSI-based global data set of dry and wet spells for 1901-2009. *J. Geophys. Res. Atmos*. **118**, 4025-4048 (2013).

20. Vyse, K., Pagter, M., Zuther, E & Hincha, D. K. Deacclimation after cold acclimation—a crucial, but widely neglected part of plant winter survival. *J. Exp. Bot*. **70**, 4595-4604 (2019).

21. Tan, X. Q. et al. Characterization of the Difference between Day and Night Temperatures on the Growth, Photosynthesis, and Metabolite Accumulation of Tea Seedlings. I*nt. J. Mol. Sci*. **24**, 6718 (2023).

22. Blumstein, M., Gersony, J., Martínez-Vilalta, J. & Sala, A. Global variation in nonstructural carbohydrate stores in response to climate. *Glob Chang Biol*. **29**, 1854-1869 (2022).

23. Körner, C. Plant adaptation to cold climates. *F1000Res*. **5** (2016).

24. Ouyang, L., Leus, L, Keyser E. D. & Labeke M. C. V. Temperature is an important driver for cold acclimation in garden roses. *Sci. Hortic*. **296**, 110905 (2022).

25. Vitasse, Y., Lenz, A., Hoch, G. & Körner, C. Earlier leaf-out rather than difference in freezing resistance puts juvenile trees at greater risk of damage than adult trees. *J. Ecol*. **102**, 981-988 (2014).

26. Zohner, C. M. et al. Late-spring frost risk between 1959 and 2017 decreased in North America but increased in Europe and Asia. *Proc. Natl. Acad. Sci. U.S.A*. **117**, 12192-12200 (2020).

27. Baffoin, R. et al. Seasonal changes in carbohydrates and water content predict dynamics of frost hardiness in various temperate tree species. *Tree Physiol*. **41**, 1583-1600 (2021).

28. Malyshev, A. V., Henry, H. A. L. & Kreyling, J. Relative effects of temperature vs.

photoperiod on growth and cold acclimation of northern and southern ecotypes of the grass *Arrhenatherum elatius*. *Environ. Exp. Bot*. **106**, 189-196 (2014).

29. Sierra-Almeida, A, Cavieres, L. A. & Bravo. Freezing resistance of high-elevation plant species is not related to their height or growth-form in the Central Chilean Andes. *Environ. Exp. Bot*. **69**, 273-278 (2010).

30. Liu, Q. et al. Extension of the growing season increases vegetation exposure to frost. *Nat Commun*. **9**, 426 (2018).

31. Wang, J. M. et al. Late spring frost delays tree spring phenology by reducing photosynthetic productivity. *Nat. Clim. Change*. **15**, s41558-024-02205-w (2025).

32. Neuner, G. Frost resistance in alpine woody plants. *Front. Plant Sci*. **5**, 654 (2014).

33. Bennie, J., Kubin, E., Wiltshire, A., Huntley, B. & Baxter, R. Predicting spatial and temporal patterns of bud-burst and spring frost risk in north-west Europe: the implications of local adaptation to climate. *Glob Chang Biol*. **16**, 1503-1514 (2010).

34. Wang, T. et al. The influence of local spring temperature variance on temperature sensitivity of spring phenology. Glob Chang Biol. 20, 1473-1480 (2014).
